# Supplementary material for: The Impact of Different Planting Systems on the Bacterial Diversity of Rice Cultivated in Saline Soil Based on 16S rRNA Gene-Based Metagenomic Insights
Source: MDPI journal article supplement (doi:10.3390/agriculture12101624), 2022-10-06
Supplement: s1 [file s1]

## Supplementary materials

**Table S1: Micronutrient analyses of the soil samples collected from three different districts of Tamil Nadu**

| Soil Sample No | Copper (ppm) | Manganese (ppm) | Zinc (ppm)  | Iron (ppm)   | Calcium (ppm) | Magnesium (ppm) |
|----------------|--------------|-----------------|-------------|--------------|---------------|-----------------|
| 1              | 0.54 ± 0.01  | 0.71 ± 0.01     | 1.64 ± 0.08 | 8.45 ± 0.04  | 5.21 ± 0.19   | 0.64 ± 0.03     |
| 2              | 0.32 ± 0.03  | 0.86 ± 0.04     | 2.18 ± 0.09 | 11.26 ± 0.21 | 4.87 ± 0.12   | 1.12 ± 0.06     |
| 3              | 0.68 ± 0.02  | 1.42 ± 0.03     | 1.76 ± 0.02 | 15.18 ± 0.41 | 5.68 ± 0.29   | 0.87 ± 0.02     |
| 4              | 0.37 ± 0.01  | 0.68 ± 0.03     | 0.94 ± 0.03 | 12.64 ± 0.13 | 8.72 ± 0.04   | 1.24 ± 0.01     |
| 5              | 0.56 ± 0.03  | 0.57 ± 0.02     | 1.12 ± 0.04 | 10.96 ± 0.12 | 4.38 ± 0.12   | 1.06 ± 0.01     |
| 6              | 0.25 ± 0.01  | 1.62 ± 0.06     | 0.85 ± 0.04 | 8.59 ± 0.28  | 5.64 ± 0.19   | 0.98 ± 0.02     |
| 7              | 1.16 ± 0.05  | 0.39 ± 0.02     | 1.16 ± 0.03 | 16.47 ± 0.28 | 10.13 ± 0.21  | 0.86 ± 0.04     |
| 8              | 0.71 ± 0.01  | 0.55 ± 0.02     | 2.06 ± 0.03 | 15.44 ± 0.21 | 9.05 ± 0.06   | 1.14 ± 0.05     |
| 9              | 0.62 ± 0.02  | 0.92 ± 0.01     | 1.87 ± 0.07 | 12.95 ± 0.37 | 11.47 ± 0.37  | 0.77 ± 0.03     |
| 10             | 0.29 ± 0.01  | 1.18 ± 0.04     | 1.19 ± 0.01 | 17.38 ± 0.69 | 6.28 ± 0.12   | 1.28 ± 0.01     |
| 11             | 1.15 ± 0.02  | 1.86 ± 0.03     | 2.52 ± 0.01 | 15.47 ± 0.46 | 7.94 ± 0.22   | 1.09 ± 0.05     |
| 12             | 2.14 ± 0.09  | 0.89 ± 0.04     | 1.46 ± 0.01 | 18.62 ± 0.4  | 12.86 ± 0.16  | 0.96 ± 0.03     |
| 13             | 1.96 ± 0.06  | 2.15 ± 0.06     | 2.13 ± 0.01 | 17.54 ± 0.52 | 10.34 ± 0.02  | 1.64 ± 0.02     |

Values in each column are mean of three replications ± SE (standard error)

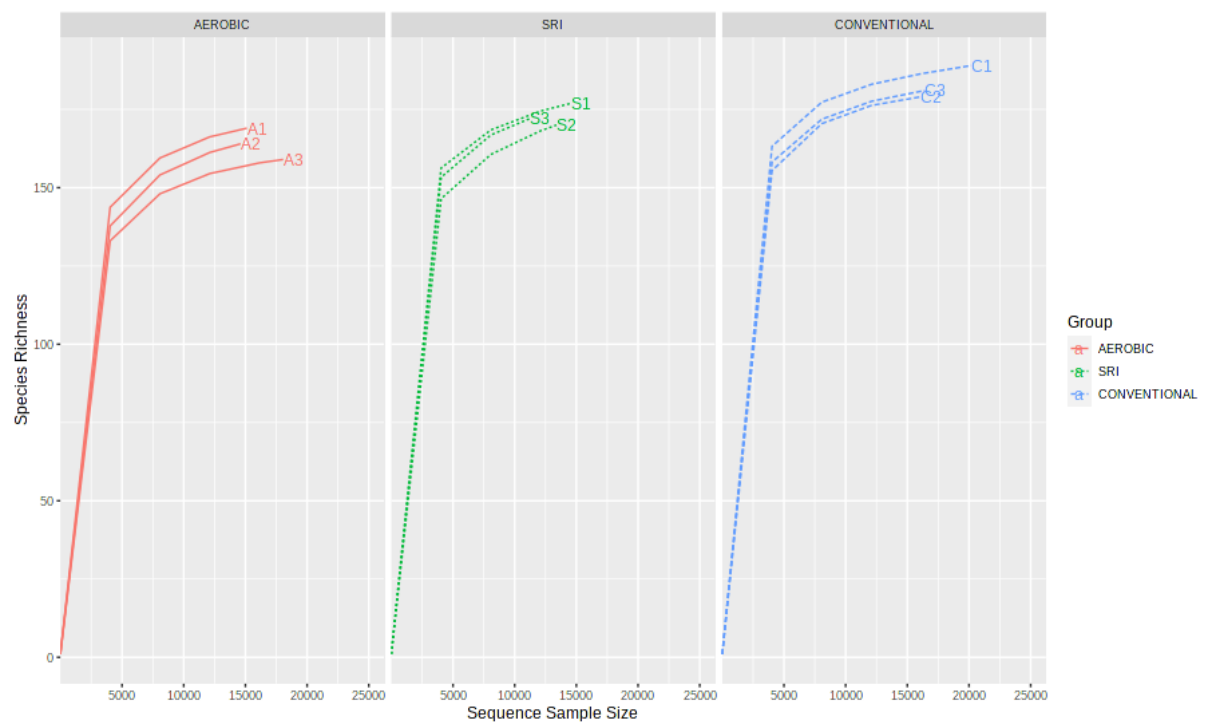

**Figure S1:** Rarefaction analysis of soil samples from three different types of rice planting systems.



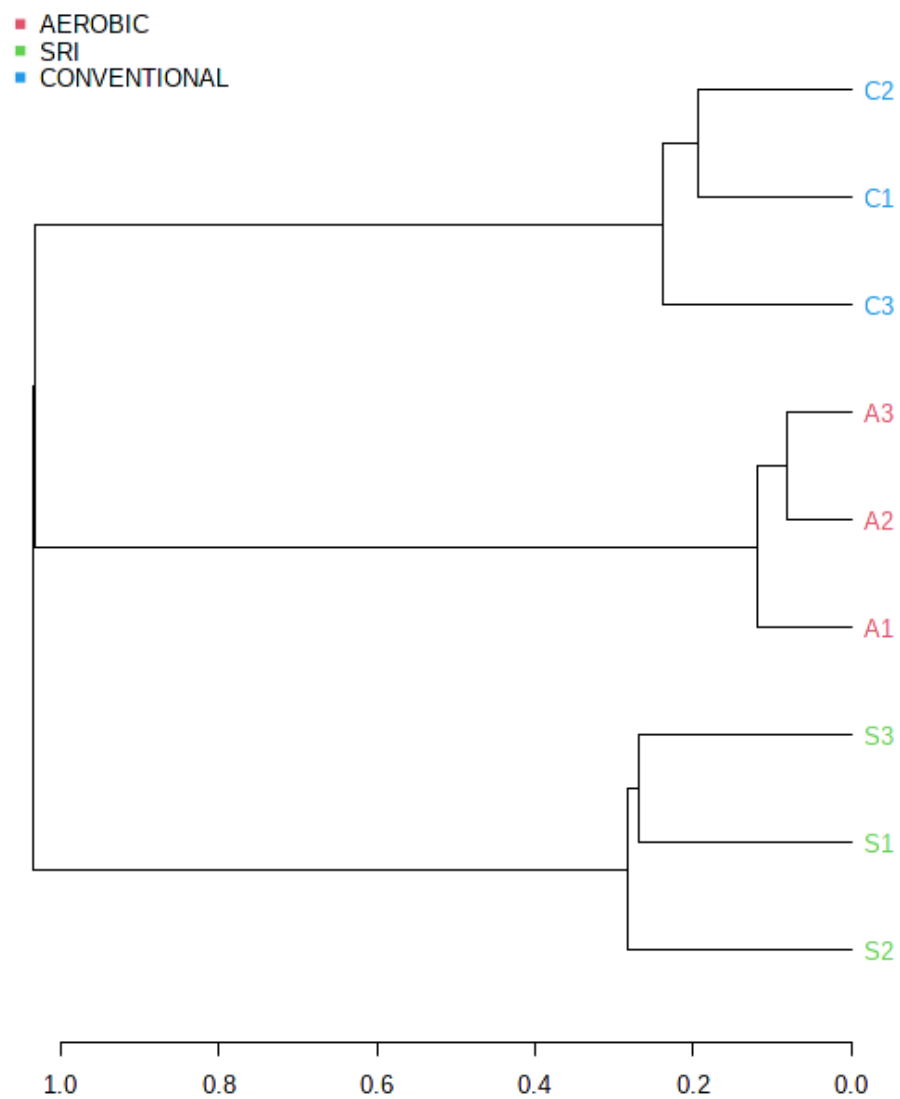

**Figure S3:** Hierarchical clustering/Dendrogram showing the phylogenetic relationship of three different types of rice planting systems.

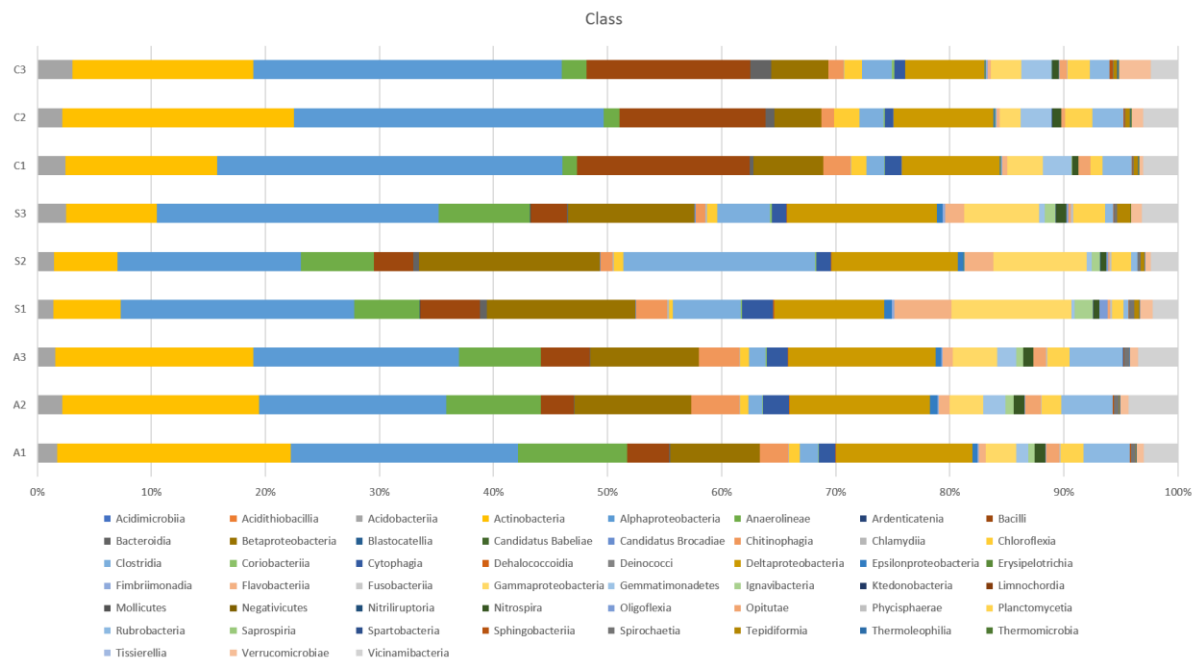

**Figure S4:** Taxonomic composition and relative abundance of bacterial classes of three different types of rice planting systems.

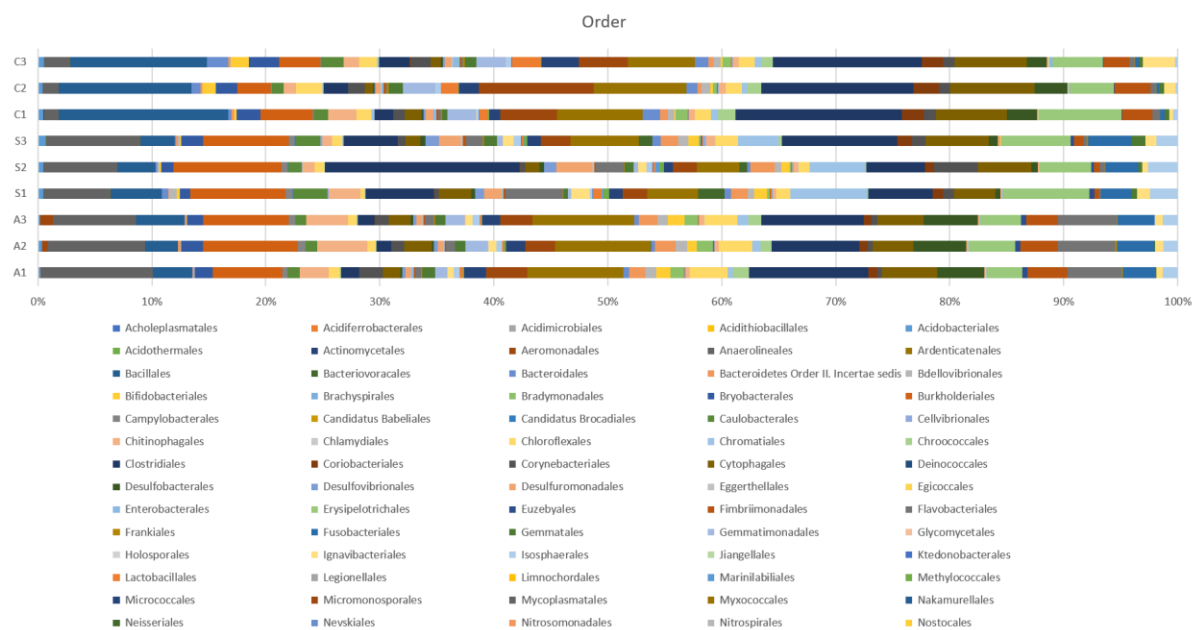

**Figure S5:** Taxonomic composition and relative abundance of bacterial levels of three different types of rice planting systems.

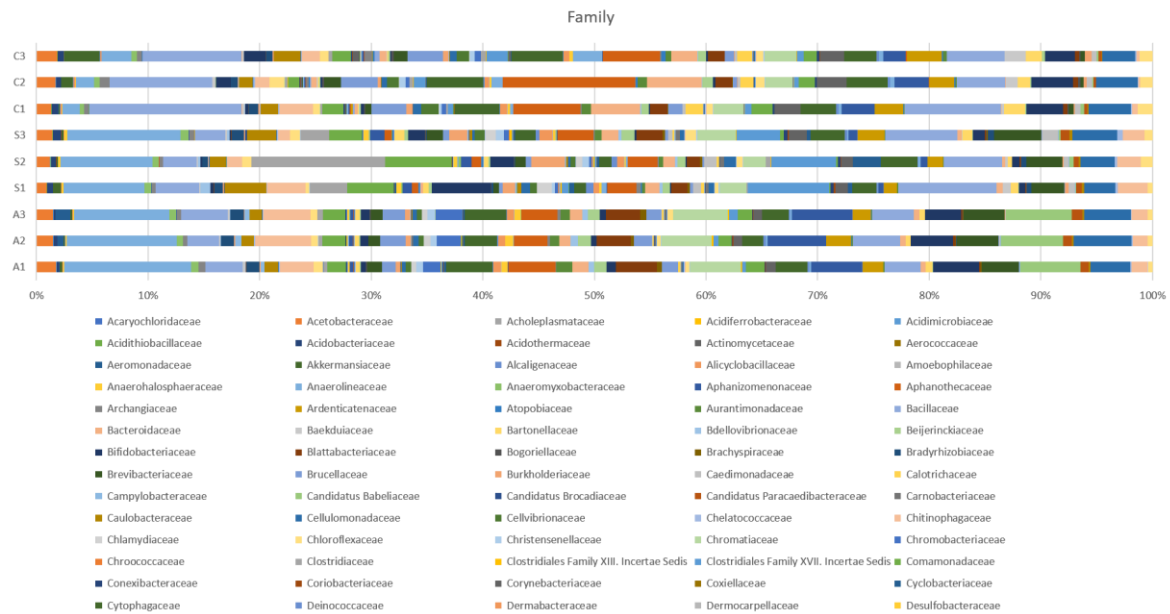

**Figure S6:** Taxonomic composition and relative abundance of bacterial family of three different types of rice planting systems.

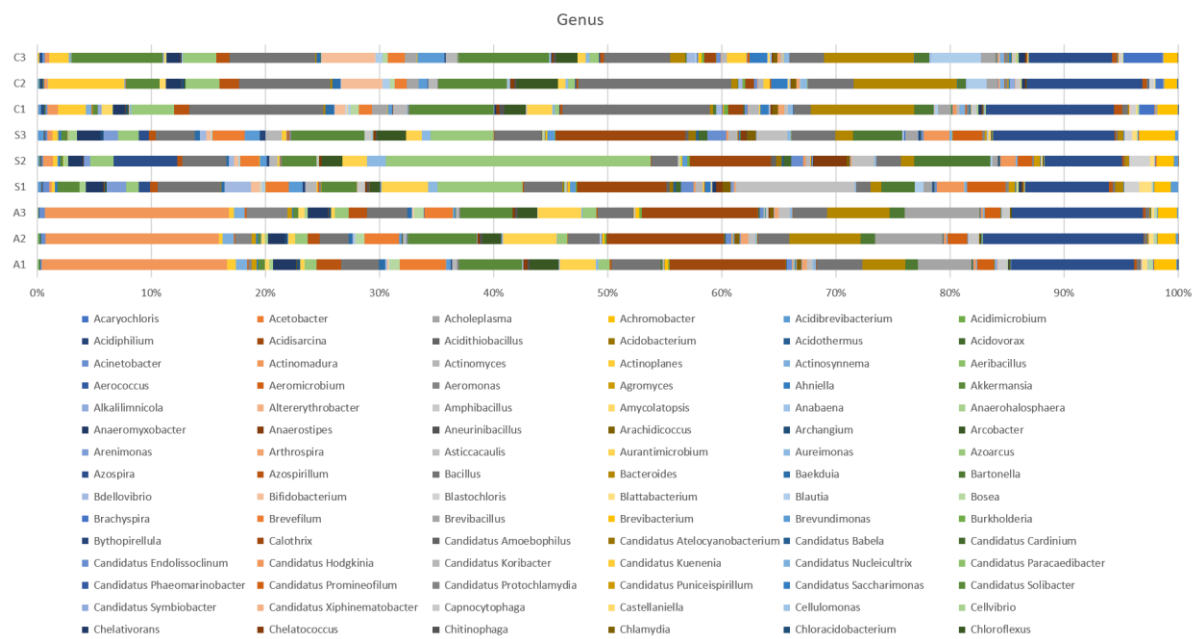

**Figure S7:** Taxonomic composition and relative abundance of bacterial genera of three different types of rice planting systems.

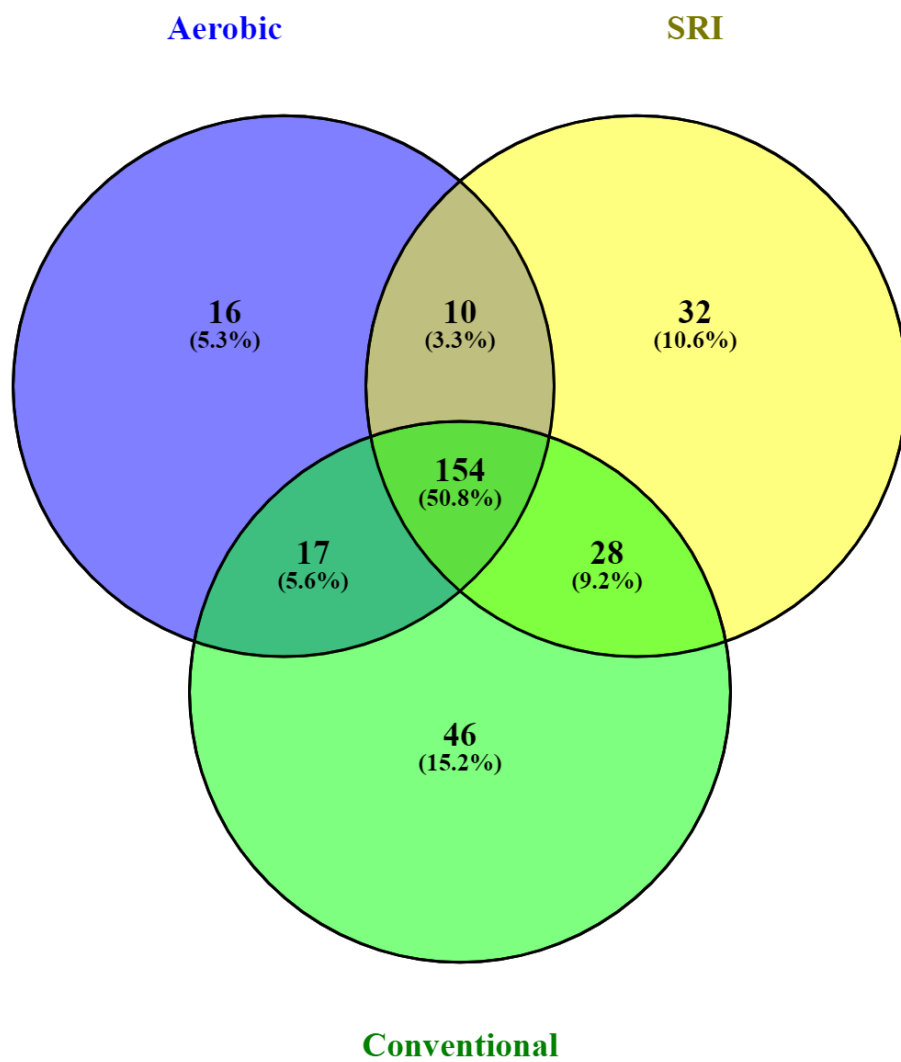

**Figure S8:** Venn diagram depicting the distribution of Amplicon sequence variants of the bacterial community of aerobic, conventional and SRI soil samples.
