# Supplementary material for: The Impact of Different Planting Systems on the Bacterial Diversity of Rice Cultivated in Saline Soil Based on 16S rRNA Gene-Based Metagenomic Insights
Source: MDPI journal article supplement (doi:10.3390/agriculture12101624), 2022-10-06
Supplement: s1 [file s1]

Archive with 1 entries (1 files):
- agriculture-1922189-supplementary.pdf
